1  
2  
3  
4  
5  
6  
7  
8  
9  
10  
11  
12  
13  
14  
15  
16  
17  
18  
19  
20  
21  
22

## **Genetic Characterization and Curation of Diploid A-Genome Wheat Species**

**One-sentence summary:** Genotyping of gene bank collections of diploid A-genome relatives of wheat uncovered relatively higher genetic diversity and unique evolutionary relationships which gives insight to the effective use of these germplasm for wheat improvement.

### **Authors:**

Laxman Adhikari<sup>1</sup>, John Raupp<sup>1</sup>, Shuangye Wu<sup>1</sup>, Duane Wilson<sup>1</sup>, Byron Evers<sup>1</sup>, Dal-Hoe Koo<sup>1</sup>, Narinder Singh<sup>1,‡</sup>, Bernd Friebe<sup>1</sup> and Jesse Poland<sup>1,2,\*</sup>

### **Affiliations:**

Department of Plant Pathology, Kansas State University, Manhattan, KS; Wheat Genetic Resource Center (WGRC), Kansas State University, Manhattan, KS 66502  
Center for Desert Agriculture, King Abdullah University of Science and Technology, Thuwal, Saudi Arabia

<sup>‡</sup> current address: Bayer Crop Science

\* Corresponding author. Email: [jpoland@ksu.edu](mailto:jpoland@ksu.edu)

**Short title: Characterization of Diploid Wheat**

23 **Abstract**

24 The A-genome diploid wheats represent the earliest domesticated and cultivated wheat species in the  
25 Fertile Crescent and the donor of the wheat A sub-genome. The A-genome species encompass the  
26 cultivated einkorn (*Triticum monococcum* L. subsp. *monococcum*), wild einkorn (*T. monococcum* L.  
27 subsp. *aegilopoides* (Link) Thell.) and *T. urartu*. We evaluated the collection of 930 accessions in the  
28 Wheat Genetics Resource Center (WGRC), using genotyping-by-sequencing (GBS) and identified  
29 13,089 curated SNPs. Genomic analysis detected misclassified and duplicated accessions with most  
30 duplicates originated from the same or a nearby locations. About 56% (n = 520) of the WGRC A-  
31 genome species collections were duplicates supporting the need for genomic characterization for  
32 effective curation and maintenance of these collections. Population structure analysis confirmed the  
33 morphology-based classifications of the accessions and reflected the species geographic distributions.  
34 We also showed that the *T. urartu* as the closest A-genome diploid to wheat through phylogenetic  
35 analysis. Population analysis within the wild einkorn group showed three genetically distinct clusters,  
36 which corresponded with wild einkorn races  $\alpha$ ,  $\beta$ , and  $\gamma$  described previously. The *T. monococcum*  
37 genome-wide  $F_{ST}$  scan identified candidate genomic regions harboring domestication selection signature  
38 (*Btr1*) on the short arm of chromosome 3A<sup>m</sup> at ~ 70 Mb. We established A-genome core set (79  
39 accessions) based on allelic diversity, geographical distribution, and available phenotypic data. The  
40 individual species core set maintained at least 80% of allelic variants in the A-genome collection and  
41 constitute a valuable genetic resource to improve wheat and domesticated einkorn in breeding programs.

42

43

44

45 **Key Words:** Einkorn, A-genome wheat species, *T. urartu*, *T. monococcum*, *aegilopoides*, duplicates,  
46 population structure, Nei's index,  $F_{ST}$  scan, *Btr1*, selection signal, GBS, misclassified, core collection

47

## 48 Introduction

49

50 Wheat wild relatives are an important reservoir of genetic diversity that can be utilized for wheat  
51 improvement, particularly for diseases, insect pests, and abiotic stress tolerance (Wulff & Moscou,  
52 2014). Cultivated tetraploid (pasta wheat, *Triticum turgidum*) and hexaploid (bread wheat, *Triticum*  
53 *aestivum*) wheat arose through successive whole-genome hybridization between related species in the  
54 *Triticeae*. Although polyploidization in wheat enabled broad adaptation and genome plasticity found in  
55 polyploids (Comai, 2005), it also created severe genetic bottlenecks within each subgenome (Feldman &  
56 Levy, 2012). Likewise, of the three natural races within wild einkorn, only one natural race ( $\beta$ ) has been  
57 domesticated, thus, genetic diversity in the wild einkorn is expected to be greater than in domesticated  
58 einkorn (Pourkheirandish et al., 2018). Some recent findings, however, reported no or low reduction in  
59 nucleotide diversity through einkorn domestication, most likely indicating a minimal bottleneck during  
60 domestication of cultivated einkorn (Kilian et al., 2007). This was true when diversity comparisons were  
61 performed between wild einkorn specific races ( $\alpha$  and  $\beta$ ) vs. domesticated einkorn. However, when the  
62 comparison was made between the domesticated einkorn vs. all groups of wild einkorn, the wild einkorn  
63 diversity was much higher than found in the cultivated accessions. The value of A-genome species  
64 diversity for alleviating the wheat diversity bottleneck have been described (Brunazzi et al., 2018;  
65 Mondal et al., 2016). Thus, diversity assessment in germplasm collections of diploid A-genome species  
66 is crucial for conservation planning and efficient utilization of germplasm in breeding.

67

68 A-genome wheat species ( $2n = 2x = 14$ , AA) are diploid grasses including the wild einkorn (*T.*  
69 *monococcum* L. subsp. *aegilopoides* (Link) Thell.), domesticated einkorn (*T. monococcum* L. subsp.  
70 *monococcum*), and *T. urartu* (van Slageren, 1994). Molecular and cytological studies have confirmed  
71 that *T. urartu*, a related species sharing the same genome as domesticated einkorn, is the A-genome  
72 ancestor to cultivated wheat (*T. aestivum*) (Dong et al., 2012). In the first polyploidization event that  
73 occurred ~500,000-150,000 million years ago (MYA) (Charmet, 2011), *T. urartu* naturally hybridized  
74 with a B-genome donor grass, an extant species but close relative of *Aegilops speltoides* Tausch, giving  
75 rise to the wild tetraploid wheat *T. turgidum* L. subsp. *dicoccoides* (Körn. Ex Asch. & Graebn.) Thell.  
76 (AABB,  $2n = 4x = 28$ ) (Nair, 2019). In the next event, the cultivated tetraploid emmer wheat (*T.*  
77 *turgidum* subsp. *durum* (Desf.) Husn.) naturally hybridized with the D-genome donor species (*Ae.*  
78 *Tauschii* Coss) forming hexaploid bread wheat (AABBDD,  $2n = 6x = 42$ ). The A-genome species

79 morphologically resemble cultivated tetraploid and hexaploid wheat more than any other surviving  
80 diploid genome donors and are predominant in the Fertile Crescent (Heun et al., 1997). Domestication of  
81 einkorn wheat, together with emmer wheat and barley around 12,000 years ago, transformed human  
82 culture from hunting-gathering to agriculture, popularly known as the ‘Neolithic Revolution’ (Kilian et  
83 al., 2010). The Karacadağ mountain in the southeast Turkey has been considered the geographical point  
84 for einkorn domestication (Brandolini et al., 2016).

85

86 The donor of the A genome of the bread wheat, *T. urartu*, is estimated to have diverged nearly 0.57 –  
87 0.76 MYA from another widespread A-genome diploid species, *T. monococcum*. Interspecific crosses  
88 between *T. urartu* and *T. monococcum* are infertile, confirming the large phylogenetic distance and  
89 genetic differentiation of the species (Middleton et al., 2014). Like hexaploid wheat, A-genome species  
90 have a large genome size with a mean nuclear DNA content of 5.784 pg/1C in *T. urartu* to 6.247 pg/1C  
91 in *T. monococcum* subsp. *aegilopoides* (Özkan et al., 2010). Morphologically, *T. urartu* possesses  
92 smooth leaves, a brittle rachis, and smaller anthers (< 0.3 mm). The wild einkorn (*T. monococcum*  
93 subsp. *aegilopoides*) are characterized with a brittle rachis, hairy leaves, and larger ( $\geq 0.5$  mm) anthers.  
94 Domesticated einkorn has a nonbrittle (semitough) rachis with smooth leaves (Brandolini & Heun,  
95 2019).

96

97 Being homologous to the wheat A-genome, these species provide useful sources for wheat improvement  
98 using wide crosses and cytogenetics approaches. The A-genome species are important genetic resources  
99 for pest resistance and stress tolerance. For example, *T. urartu* was identified as a source of resistance to  
100 the root lesion nematode *Pratylenchus thornei* (Sheedy et al., 2012) and stem rust (Rouse & Jin, 2011).  
101 Novel stem rust resistance genes *SrTm5* and *Sr60* were mapped in an F<sub>2</sub> population derived from crosses  
102 between wild and the cultivated einkorn (Chen et al., 2018). *Sr35*, the first gene cloned against the  
103 devastating stem rust race UG99, also originates from *T. monococcum* (Saintenac et al., 2013). A leaf  
104 rust gene, *Lr63*, in wheat chromosome 3AS was introgressed from *T. monococcum* (Kolmer et al.,  
105 2010). Surveying the genetic variation in A-genome species that can be utilized in wheat improvement  
106 has lagged, considering the potential value of more effectively utilizing these species for wheat  
107 improvement.

108

109 Einkorn has multiple botanical names in the literature as proposed by the various taxonomists, and  
110 confusion related to the einkorn nomenclature is widespread. In 1948, Schiemann classified einkorn as  
111 wild einkorn (*T. boeoticum* subsp. *thaoudar*), the feral einkorn (*T. boeoticum* subsp. *aegilopoides*), and  
112 the domesticated einkorn (*T. monococcum* subsp. *monococcum*) (Brandolini et al., 2016; Schiemann,  
113 1948). MacKey published einkorn classification in 1954 (Key, 1954) and updated the nomenclature  
114 several times through 2005 (Mac Key, 2005a). van Slageren also published the einkorn nomenclature,  
115 where the wild and domesticated einkorn were simply named as *T. monococcum* L. subsp. *aegilopoides*  
116 (hereafter subsp. *aegilopoides*) and *T. monococcum* L. subsp. *monococcum* (hereafter subsp.  
117 *monococcum*), respectively (van Slageren, 1994). In this study, we follow van Slageren's (1994) einkorn  
118 taxonomy, because the A-genome species collection in the Wheat Genetics Resource Center (WGRC) at  
119 Kansas State University (KSU) were initially classified using this nomenclature (van Slageren, 1994).

120

121 A well-characterized population structure of A-genome species is critical to formulating effective  
122 conservation strategy, selecting diverse germplasm, and enhancing the accuracy of the genomic analysis  
123 with structure information (Singh et al., 2019). Population structure and diversity assessment have  
124 become easier with next-generation sequencing, which makes discovery of thousands of genotyping  
125 markers possible. Here, we used genotyping by sequencing (GBS) for single nucleotide polymorphism  
126 (SNP) discovery. GBS is straightforward, high-throughput, and with multiple downstream pipelines for  
127 data processing (Poland et al., 2012a). However, population structure of A-genome species has not been  
128 evaluated in detail with the resource of whole-genome profiling. Therefore, our objectives are to : i)  
129 curate A-genome wheat accessions in the gene bank by identifying duplicates and misclassified  
130 accessions, ii) assess the population structure and genetic diversity of the A-genome wheat species, and  
131 iii) establish genetically, geographically, and phenotypically representative core collections for A-  
132 genome species within the WGRC gene bank.

133

134

## 135 **Results**

136

### 137 **A-Genome Species Distribution**

138 Most of the wild einkorn (subsp. *aegilopoides*) in our collection, were collected across Turkey, northern  
139 Iraq, west Iran, and Transcaucasia, whereas the majority of domesticated einkorn (subsp. *monococcum*)

140 were from west Turkey and the Balkans (Figure 1, Supplementary Table S1). About half of the *T. urartu*  
141 accessions were from eastern Lebanon, around the Beqaa Valley, and a major part were from southeast  
142 Turkey (Figure 1). The A-genome species are known to span from Transcaucasia through Anatolia to  
143 the Caspian Sea. The WGRC collection covers the geographic range of this species. After genomic  
144 characterization including misclassified accessions adjustment, we retained 196 *T. urartu*, 145 of  
145 domesticated einkorn, and 584 wild einkorn (Supplementary Table S1). There were also 5 tetraploids  
146 identified in the population which were curated to correct species.

147

### 148 **Markers and Genotyping**

149 For all A-genome accessions, we identified 44,215 biallelic SNPs after a filter for passing Fisher exact  
150 test of disassociated alleles. Separating this by subspecies, we had 24,314 biallelic SNPs for subsp.  
151 *aegilopoides*, 19,940 biallelic SNPs for *T. urartu*, and 13,957 biallelic SNPs for subsp. *monococcum*.  
152 Upon filtration (MAF > 0.01, 30% < missing, 10% < heterozygosity), we retained 7432 SNPs for *T.*  
153 *urartu* and 6734 SNPs for *T. monococcum*, 6343 SNPs for subsp. *aegilopoides*, and 3980 for subsp.  
154 *monococcum*. For wheat and A-genome diploids together we found 15,300 filtered SNPs. For A-genome  
155 species diversity assessment, thousands of segregating loci were available for the groups defined by  
156 population analysis and core set selections (Table 1). We filtered the loci for MAF (MAF > 0.01) before  
157 splitting the VCF file to the species and sub-species and observed loci that were fixed or otherwise one  
158 heterozygous genotype call within the individual species and subspecies. To compute total segregating  
159 loci per group and minimize the effect of potential sequencing error, we did further filtration and  
160 removed any loci that were segregating only due to a single heterozygous genotype and otherwise the  
161 major allele is fixed in remaining population (Table 1).

162

### 163 **Gene Bank Curation**

164 We identified and corrected a total of 22 misclassified accessions using fastStructure analysis,  
165 phylogenetic and PCA clustering (Supplementary Figure S1) including nine *T. urartu*, two subsp.  
166 *monococcum*, six subsp. *aegilopoides*, and five tetraploid accessions (Supplementary Table S3). As  
167 large number of accessions in both *T. urartu* and subsp. *aegilopoides* collection were from southeast  
168 Turkey; we observed most of the misclassified accessions also were from the same site.

169

170 While evaluating the collection for duplicate accessions, we compared various number of loci for allele  
171 matching per A-genome species (Table 3) as the SNPs were filtered to keep only the sites with > 0.05  
172 MAF, < 50% missing and < 10% heterozygous. We identified and used a threshold of  $\geq 99\%$  identity by  
173 state (IBS) to declare the individuals as identical accessions to warrant the inclusion of identical  
174 accessions in the duplicate set (Supplementary Figure S2) with tolerance for sequencing and genotyping  
175 error. With these criteria we identified a total of 520 (56%) duplicated accessions which were mostly  
176 observed within *T. urartu* and within  $\alpha$  race subsp. *aegilopoides* (Supplementary Table S1). To confirm  
177 this analysis, we checked the collection sites of the groups of duplicates identified and all of the  
178 respective sets of duplicates were collected from the same or nearby sites. We further observed the  
179 duplicates had same phenotypes as the glume color scores were the same for sets of duplicates  
180 (Supplementary Table S1), confirming the accuracy of using the GBS data for identification of  
181 duplicated accessions. For instance, TA471 and its 11 duplicates had glume color score of 7 while on a  
182 scale of 1 (white) to 9 (black) (Supplementary Table S1).

183

#### 184 **Relationship Between A-genome Diploid and Wheat**

185 The genetic grouping of A-genome diploids and CIMMYT wheat lines together showed that wheat is  
186 closer to *T. urartu* than to *T. monococcum* (Supplementary Figure S3), a finding in agreement with the  
187 known relationship between the species. The unrooted NJ tree constructed for wheat and A-genome  
188 diploid wheat showed five accessions (TA282, TA10915, TA1325, TA1369, and TA10881) clustering  
189 far from the *T. urartu* major clade (Supplementary Figure S3). Cytological analysis identified them as  
190 tetraploid ( $2n=28$ ) (Supplementary Figure S4). Therefore, we excluded these five accessions from  
191 population analysis. This observation confirms that GBS also enables identifying cryptic accessions with  
192 different ploidy levels in the population.

193

#### 194 **A-genome Population Structure and Wild Einkorn Genetic Races**

195 Population grouping in the fastStructure analysis at  $K=2$  to  $K=7$  showed the A-genome genetic structure  
196 was split with the known biological and geographical characterization (Figure 2). This analysis revealed  
197 a number of misclassified accessions that were individually curated and checked, including  
198 morphological confirmation, and were reclassified to the appropriate group (Supplementary Table S3).

199



200 At K=2, the population differentiation occurred only at the level of species, the accessions split into *T.*  
201 *monococcum* and *T. urartu*, confirming known species differences (Figure 2). At K=3, the two  
202 subspecies of *T. monococcum* differentiated with the accessions in the  $\alpha$  wild einkorn race were clearly  
203 differentiated from domesticated einkorn. However, the other races of wild einkorn ( $\beta$  and  $\gamma$ ) appeared  
204 to be an admixture, supporting that there is not complete differentiation between the wild and  
205 domesticated einkorn, a classification that is simply based on the few morphological characteristics of  
206 the domestication syndrome.

207

208 We observed differentiation of wild einkorn into genetically distinct groups at K=7. Comparing these  
209 three wild einkorn subgroups with the  $\alpha$ ,  $\beta$ , and  $\gamma$  wild einkorn races described by (Kilian et al., 2007),  
210 we report the three genetic subgroups as representing the races  $\alpha$ ,  $\beta$ , and  $\gamma$  by identifying common  
211 USDA Plant Introduction (PI) numbers for accessions in both studies. The genetic clustering pattern and  
212 geographical distribution then confirmed that the subgroups within subsp. *aegilopoides* represents  $\alpha$ ,  $\beta$ ,  
213 and  $\gamma$  races described and we hereby name these genetic groups accordingly (Supplementary Table S4)  
214 (Kilian et al., 2007). In (Kilian et al., 2007), the  $\alpha$  race accessions were primarily from southeast Turkey,  
215 northern Iraq, and Iran; the  $\gamma$  race involves accessions from Transcaucasia to western Anatolia; and the  $\beta$   
216 race comprises a few accessions collected around Karacadag Turkey (Figure 1, Supplementary Table  
217 S1). Based on population differentiation,  $\alpha$  race exhibited the strongest differentiation with domesticated  
218 einkorn and should represent the base population of subsp. *aegilopoides*, whereas the  $\beta$  race of wild  
219 einkorn exhibited the least differentiation with subsp. *monococcum*. Interestingly, the  $\beta$  race did not  
220 fully differentiate from subsp. *monococcum* at any value of K (Figure 2), supporting that domesticated  
221 einkorn originated out of this subpopulation, which already largely differentiated from the other wild  
222 einkorn, or (2) that the  $\beta$  race represents ‘feral’ subsp. *monococcum* accessions that were, at one point,  
223 fully domesticated but reverted to wild plant types through introgression and admixture.

224

225 At K=5, the population subgrouping according to the accession origin was observed in  $\alpha$  race accessions  
226 within the wild einkorn. Accessions from Erbil (ancient name ‘Arbil’) differentiated as a subpopulation,  
227 and the accessions from Sulaymaniyah (Iraq) split as the admixture of the Erbil subgroup and the  
228 remaining accessions at K=5 (Figure 2). We could not observe any new differentiation within the wild  
229 einkorn group at K=6. However, at K=7, we observed three distinct subgroups and a higher level of  
230 admixture within the  $\alpha$  race of subsp. *aegilopoides* (Figure 2). Also, there were two main sets of



231 admixture types; the first set mainly consists of accessions from Iran that shared ancestry from the  
232 Duhok (red) and Turkey (purple) subgroups, and the second corresponds with accessions from  
233 Sulaymaniyah (Iraq) and has ancestry from all three subgroups. Hence, within the population of  $\alpha$  race  
234 einkorn accessions, three subgroups exist; Erbil, Duhok, and Turkey, and two groups of genetic  
235 admixtures (Iran and Sulaymaniyah), named from their origin.

236

237 We did not observe any subgrouping within the accessions from the southeast Turkey, yet the accessions  
238 were primarily from two sites (Sanliurfa and Mardin). The grouping pattern of three subgroups within  
239 the  $\alpha$  race accessions provided a new insight into the wild einkorn subgrouping and their genetic  
240 relationships. We did not observe within population differentiation in domesticated einkorn group.

241

242 In *T. urartu*, the subgrouping occurred at  $K=6$ , and was unchanged at  $K=7$  (Figure 2). Two major *T.*  
243 *urartu* subgroups represented accessions from Turkey (#T) and another from Lebanon (#L). Few *T.*  
244 *urartu* accessions were from Syria (#S); some showed admixture, and some had a clean ancestry that  
245 resembled accessions from Turkey (Figure 2). The few remaining accessions primarily were from  
246 Transcaucasia (#M) and exhibited an ancestry similar to accessions from Turkey (Figure 2).

247

### 248 **Phylogenetic Clustering and PCA**

249 The phylogenetic clustering split the A-genome accessions into separate clades for *T. urartu*, *T.*  
250 *monococcum* subsp. *monococcum*, and all races within the subsp. *aegilopoides* (Figure 3). Only 12  
251 accessions were retained within race  $\beta$ , and the accessions were clustered with some other domesticated  
252 einkorn accessions (Figure 3). The *T. urartu* clade distantly clustered in both PCA and phylogenetic  
253 analysis from either of the einkorn clade indicating the obvious genetic differences between species.  
254 The misclassified accessions (Supplementary Figure S1) observed in the phylogenetic clustering were  
255 re-classified into proper genotype-based classes.

256

257 A PCA plot of A-genome species also showed accessions clustering as in fastStructure and phylogenetic  
258 analysis (Supplementary Figure S5). The first principal component (PC1), which grouped the  
259 accessions of *T. monococcum* and *T. urartu* in two primary clusters, explained 58% of the variation.  
260 The PC2, which divided the einkorn accessions, explained 8% of the variation and separated

261 domesticated and different races within the wild einkorn. Misclassified accessions previously observed  
262 also were revealed in the PCA analysis and their taxonomy classification adjusted.

263

### 264 **Genetic Diversity and $F_{ST}$**

265 A considerably high Nei's diversity index (0.25) was observed for the complete set of A-genome  
266 accessions. The Nei's diversity indices for individual A-genome species ranged from 0.058 for  
267 domesticated einkorn to 0.106 for the entire einkorn group. Among the three races of wild einkorn, the  
268 Nei's diversity indices of  $\beta$  race (0.058) was the lowest and  $\gamma$  was the highest (0.093; Table 1). As  
269 expected for diverse accessions, we found a high density of alleles with low minor allele frequency  
270 (MAF) (Supplementary Figure S6).

271

272 Population differentiation within the A-genome species were further verified by pairwise fixation index  
273 ( $F_{ST}$ ) values (Nei's, 1987) computed between the groups. Pairwise  $F_{ST}$  between *T. urartu* and entire  
274 einkorn were greater than 0.80, supporting that the two species are strongly differentiated (Table 2).  
275 The pairwise  $F_{ST}$  (0.56) between the  $\alpha$  race and domesticated einkorn indicated the strongest  
276 differentiation between any two groups within the einkorn, whereas the weakest differentiation ( $F_{ST}$  =  
277 0.31) was between the  $\beta$  race and domesticated einkorn, supporting the model that this wild race was the  
278 most likely forerunner of domesticated einkorn as previously hypothesized (Kilian et al., 2007). The  
279 concept also was endorsed by the origin of  $\beta$  race einkorn in the WGRC collection, mostly from  
280 Diyarbakir and Sanliurfa, which are near Karacadag and Kartal-Karacadag mountains (points of  
281 domestication). Nonetheless, the genetic grouping of  $\beta$  also occurred with subsp. *monococcum* in the  
282 unrooted NJ tree (Figure 3). Pairwise  $F_{ST}$  (~ 0.40) between pairs: ' $\gamma$  race - subsp. *monococcum*' and ' $\gamma$   
283 race -  $\alpha$  race' implicit the differentiation of  $\gamma$  race as a genetically intermediate type from truly wild  $\alpha$   
284 race and domesticated einkorn (Table 2). The pairwise  $F_{ST}$  computed between two subpopulations  
285 (Turkey and Lebanon) of *T. urartu* was 0.52, which also agrees with the population structure analysis.

286

287 Pairwise  $F_{ST}$  computed between the subpopulations within  $\alpha$  race of subsp. *aegilopoides* signaled out the  
288 geographical differentiation and the potential gene flow within this wild einkorn race. Consistent with  
289 the fastStructure output, the Erbil subgroup showed the stronger differentiation (higher  $F_{ST}$ ) with other  
290 wild einkorn subgroups (Supplementary Table S5). The subgroup Duhok and southeast Turkey and  
291 their admixture group (Iran) had the minimum pairwise  $F_{ST}$  (~ 0.12). The accessions within the

292 admixture group of Sulaymaniyah displayed almost similar differentiation ( $\sim F_{ST} = 0.16$ ) with three  
293 subgroups, which agrees with population structure as the admixture group has ancestry from all three.

294

### 295 **F<sub>ST</sub> Scan and Einkorn Selection Signature**

296 After filtration and imputation, we had 6,622 SNPs segregating in *T. monococcum* on which we  
297 calculated per site  $F_{ST}$  values for each of the seven chromosomes that ranged from near 0 to 1. Both  
298 methods, Porto-Neto et al. (2013) and VCFtools, produced similar results for raw and smoothed  $F_{ST}$   
299 values. We used a genome-wide threshold of  $3\sigma$  (0.24) over the mean  $F_{ST}$ , from which we observed only  
300 a single-selection signature on short arm of chromosome 3A (Supplementary Figure S7) after smoothing  
301 using Lowess method ( $f = 0.1$ ) (Pintus et al., 2014). This selection signature corresponded to the locus  
302 that harbors the brittle rachis 1 (*Btr1*) (Pourkheirandish et al., 2018) and was supported by the BLAST  
303 hit of a coding sequence (Supplementary text S1) of *Btr1* on the reference genome used to genotype our  
304 population (*T. urartu* pseudomolecule), which was occurred at 62 Mb on chromosome 3A. We also  
305 observed that the raw  $F_{ST}$  values for three consecutive sites of the region (62 Mb) had the highest ( $F_{ST}$   
306 =1) values. Thus, this selection scan identified the impact of selection for *Btr1* in the domesticated  
307 einkorn.

308

### 309 **A-genome Core Collection**

310 To maximize the utility of the WGRC collection we identified a core set that captured the majority of  
311 allelic diversity within 19 *T. urartu* accessions, and 60 accessions of *T. monococcum* (einkorn wheat)  
312 (Supplementary Table S2). In core sets of the entire A-genome collection, we captured ~98 % of the  
313 identified alleles, whereas each separate sub-core also captured at least 80% of the segregating alleles of  
314 the respective species-specific collections (Table 1). Richness in allelic diversity within the core  
315 collections was confirmed by the higher Nei's diversity index (0.27) of the selected cores relative to the  
316 entire collection (0.25) (Table 1). Distribution of the core set accessions in the phylogenetic cluster,  
317 PCA clusters, and in the geographic map showed that the selected accessions also represented all  
318 subgroups within the population and covered the geographic range (Supplementary Figure S8 – S10).  
319 Ranges of glume color scores (Supplementary Table S2) in the core indicated that the core collections  
320 are also an excellent representative of phenotypic variations within the whole collection.

321

### 322 **Discussion**

323

## 324 **A-Genome Species Distribution, Einkorn Nomenclatures and Morphology**

325 Our results confirm that the WGRC A-genome collection includes arrays of naturally selected  
326 germplasm around the center of origin (Figure 1). While verifying the morphologically based grouping  
327 of A-genome species through population analysis, we identified three genetically different wild einkorn  
328 races (Figure 2 and 3). This information is very crucial in handling a large group of wild einkorn so that  
329 accessions with desired genetic background and morphology of interest can be selected for utilization in  
330 breeding and further investigation. The wild einkorn genetic races described herein, matched with the  
331 races described Kilian et al. (2007), add information to establish the evolutionary and genetic  
332 relationships between wild and domesticated einkorn wheats.

333

334 However, various nomenclature of the einkorn (Supplementary Figure S11) creates a conundrum in  
335 interpreting the different races within the wild einkorn. Some einkorn nomenclature is written in  
336 multiple languages; Schiemann (1948) published his nomenclature in German and Dorofeev et al.  
337 (1979) in Russian, which could have reduced the acceptance of the nomenclatures by the wider research  
338 communities (Dorofeev et al., 1979). In a revised form of MacKey's classification (Mac Key, 2005b),  
339 the *T. monococcum* subsp. *boeoticum* was changed to *T. monococcum* subsp. *aegilopoides* (Goncharov,  
340 2011). Therefore, no single einkorn classification is deemed to be the most widely accepted and  
341 uniformly used. The van Slageren (1994) nomenclature that we follow also is mostly in agreement with  
342 the MacKey classification, because both systems use *T. monococcum* subsp. *aegilopoides* as the wild  
343 einkorn. With all these issues, an updated and widely accepted monograph of einkorn may help  
344 maintaining uniformity in taxonomy of these natural accessions.

345

346 Species and subspecies classification is first based on morphology. Multiple studies also have discussed  
347 different ecogeographical wild einkorn races that have intermediate morphology. Van Zeist (1992)  
348 described two groups of wild einkorn: the first group (*T. boeoticum* subsp. *thaoudar*) predominately  
349 exists in the southeast Turkey, northern Iraq, and west Iran, and the second group (*T. boeoticum* subsp.  
350 *aegilopoides*) primarily occurs in the west Anatolian center (VAN ZEIST, 1992). The first group of  
351 accessions had a double-grained spikelet, and the second group was single-grained, suggesting that the  
352 second group is more similar to domesticated einkorn. Brandolini and Heun (2019) explained the *T.*  
353 *boeoticum* subsp. *aegilopoides* as an intermediate type feral (semi-wild) einkorn with a semi-brittle

354 rachis and *T. boeoticum* subsp. *thaoudar* as the truly wild einkorn with an extremely brittle rachis and  
355 argued on the quantitative nature of brittleness in einkorn wheat (Brandolini & Heun, 2019). They  
356 hypothesized that the feral einkorn had evolved when agriculture moved from the southeast to west  
357 Turkey and Balkans. The semi-brittle rachis breaks into two parts only after being bent and the naturally  
358 emerged semi-brittle rachis einkorn mutant still exists in the vicinity of the Karacadag, however, the  
359 area is predominant for the truly wild double-grained einkorn (Brandolini & Heun, 2019). Some  
360 einkorn accessions with intermediate leaf hairiness, a trait used to classify accessions that is common  
361 only in wild einkorn, was also observed (Empilli et al., 2000), indicating that einkorn with intermediate  
362 or intergraded morphological characteristics are common (Harlan & Zohary, 1966). The three genetic  
363 races of wild einkorn observed in this study also possess unique genetic relationships with cultivated  
364 einkorn, as shown by phylogenetic grouping and pairwise  $F_{ST}$  values, showing the varying levels of  
365 relatedness within and between wild einkorn accession.

366

### 367 **Gene Bank Curation**

368 Globally, plant gene banks often suffer from identified and unidentified duplicates that unnecessarily  
369 increase maintenance costs (Díez et al., 2018). Here, we curated 930 A-genome species accessions in  
370 WGRC gene bank, identifying duplicates and misclassified accessions, and recognizing valuable unique  
371 accessions using genotyping. The existence of misclassified accessions in the gene bank may be due to  
372 human error on class assignment and/or data recording; rarely, some accessions might also have  
373 controversial morphology. As an example of severe misclassification, consider the wild einkorn  
374 accession PI 427328 discussed earlier. Except for the WGRC and Leibniz gene banks, other three gene  
375 collection agencies have listed this accession (PI 427328) as *T. urartu* ([https://www.genesys-](https://www.genesys-pgr.org/a/v2JRrMq2g22)  
376 [pgr.org/a/v2JRrMq2g22](https://www.genesys-pgr.org/a/v2JRrMq2g22)), illustrating the importance of genetic scrutiny of the misclassified accessions  
377 within the A-genome accessions in different repositories. This genotype-based curation reduces the  
378 gene bank operation costs and makes germplasms preservation and utilization easier.

379

### 380 ***T. urartu*: the Closest A-genome Diploid Relative of Wheat**

381 With GBS information here we showed that *T. urartu* is the closest diploid A-genome relative of wheat  
382 and thereby most likely donor of A-genome to the hexaploid wheat (Supplementary Figure S2). This  
383 study endorses the known relationships between wheat and A-genome diploids, which was based on  
384 thousands of molecular markers and samples (~1,000 diploids and > 200 wheat). Most previous studies

385 describing the relationship between *T. urartu* and wheat (Dvořák et al., 1993) however relied on  
386 cytogenetic analysis.

387

### 388 **Wild Einkorn Races**

389 The wild einkorn groups were previously divided into  $\alpha$ ,  $\beta$ , and  $\gamma$  races (Kilian et al., 2007; Zaharieva &  
390 Monneveux, 2014) which was consistent with the phylogeny observed in our study. Furthermore, we  
391 validated these race groups to match accessions with common USDA PI numbers in both studies  
392 overlapped their point of collection and almost all fall under the same races in both studies  
393 (Supplementary Table S4). Comparing between studies, there were a few discrepancies in race  
394 assignment of accessions (Kilian et al., 2007) that needed correction. For example, Killian et al. (2007)  
395 grouped PI 427328 in *T. urartu*, but our genetic analysis grouped it into  $\alpha$  race within subsp.  
396 *aegilopoides* which is also in harmony with WGRC database (accession no. TA879). According to the  
397 Genesys database (<https://www.genesys-pgr.org/10.25642/IPK/GBIS/98704>), another gene bank  
398 (Leibniz Institute of Plant Genetics and Crop Plant Research) also classified this PI 427328 within wild  
399 einkorn but under the name *T. baeoticum* Boiss. subsp. *baeoticum* exemplifying multiple wild einkorn  
400 nomenclatures use and creating confusion when describing wild einkorn. Interestingly, Kilian et al.  
401 (2007) reported a few feral types of einkorn accessions, indicating they are *T. monococcum* subsp.  
402 *aegilopoides* according to the nomenclature used, which we did not observe in the WGRC collection.  
403 We show that the wild and domesticated einkorn can clearly be differentiated based on genomic data  
404 into  $\alpha$ ,  $\beta$ , and  $\gamma$  races and the domesticated accessions. Given the difficulty and ambiguity of  
405 morphological classification, the genetic classification from genomic data can be a preferred approach to  
406 cleanly classify any given accession.

407

### 408 **Population Analysis and Different Groups Under A-genome Species**

409 The population structure and  $F_{ST}$  analysis on the A-genome species endorsed the established  
410 relationships between the species and subspecies. For instance, hybrids between *T. monococcum* and *T.*  
411 *urartu* are largely sterile and, hence, the genetic differentiation between these species is apparent  
412 (Fricano et al., 2014). Also, the intraspecific population differentiation between groups under einkorn at  
413 relatively higher K values supported the known genetic relationship between these crossable subspecies  
414 that produce mostly fertile hybrids (Harlan & Zohary, 1966).

415



416 Our analysis shows that the  $\alpha$  race einkorn accessions most likely represent the truly wild einkorn with  
417 an extremely brittle rachis, most likely the group of accessions that were traditionally classified as *T.*  
418 *boeoticum* subsp. *thaoudar* (Brandolini & Heun, 2019). Differentiation of subpopulations within the  $\alpha$   
419 race wild einkorn corresponding to geographic distribution implies migration and genetic drift among  
420 truly wild einkorn in the Near East. The *T. urartu* subgrouping of accessions from Lebanon and Turkey  
421 agrees with Wang et al. (2017) , where two subgroups, Mediterranean coastal and Mesopotamia-  
422 Transcaucasia, within *T. urartu* were reported (Wang et al., 2017).

423

#### 424 **Diversity Analysis**

425 Cultivated einkorn had a lower Nei's diversity index (0.058) than the wild sister group and wild *T.*  
426 *urartu* (Table 1), which was expected. As a domesticated species, subsp. *monococcum* experienced a  
427 strong population bottleneck and artificial selection might have triggered genetic erosion. On the other  
428 hand, the population structure of cultivated einkorn did not show substantial admixture, with the  
429 exception of a few accessions, all individuals were true to the ancestry (Figure 2), suggesting a low post  
430 domestication admixture contributing elevated diversity. The involvement of a single race ( $\beta$ ) in  
431 domestication would have further reduced allelic diversity in the cultivated einkorn; there was no  
432 difference between the Nei's diversity of  $\beta$  race (0.058) and the domesticated einkorn (0.058). Kilian et  
433 al. (2007) illustrated no nucleotide diversity was reduced during einkorn domestication; instead, they  
434 observed increased diversity in domesticated compared to wild einkorn (Kilian et al., 2007). However,  
435 the diversity assessment in (Kilian et al., 2007) could be influenced by the limited number of loci and  
436 smaller sample size; especially, diversity estimates are sensitive to sample size when there are only a  
437 handful of markers (Bashalkhanov et al., 2009; Li et al., 2009). In this experiment, we used thousands of  
438 SNP markers and have larger sample size, which minimized the effect of sample size and the number of  
439 loci. The highest Nei's diversity index (0.25) for all A-genome combinedly, and the considerably higher  
440 Nei's diversity index for each species and core collections indicated that these accessions are very  
441 important assets with novel and useful genetic variations.

442

#### 443 ***Btr1*: Einkorn Domestication Signal**

444 Through  $F_{ST}$  computation, we showed that in einkorn wheat there is a single strong selection signal  
445 observed on chromosome 3A corresponding to the *Btr1* locus (Supplementary Figure S7). Previous  
446 study also described *Btr1* as one of the most important features of einkorn domestication



447 (Pourkheirandish et al., 2018). The non-brittleness in domesticated einkorn is controlled by a single  
448 nucleotide change in *Btr1* of wild einkorn that results in an amino acid substitution (alanine to threonine)  
449 (Pourkheirandish et al., 2018). With ~ 1,000 filtered loci per chromosome, we located the candidate  
450 selection region. The availability of a *T. monococcum* reference genome to call the genotype would be  
451 ideal for obtaining dense markers and better locating the selection signature on einkorn wheat.

452

### 453 **Core Collections**

454 Establishing core collections of A-genome species enabled harnessing useful genetic variation to  
455 improve wheat and cultivated einkorn. To the best of our knowledge, this is the first genetic core of A-  
456 genome species, which included only 79 accessions and yet contains ~ 98% of the identified alleles  
457 while achieving a more than 10-fold (79/930) reduction in the number accessions (Table 1,  
458 Supplementary Table S2). The Nei's diversity index computed for these core collections supported that  
459 they have considerably higher relative diversity and can be leveraged for targeted germplasm  
460 improvement.

461

### 462 **Conclusions**

463 This study reports the important aspects of the A-genome wheat species for genetic diversity, gene bank  
464 curation, and core set selection. Following an assessment of nearly 1,000 accessions, we report that the  
465 A-genome species possess a considerable amount of genetic diversity, which can be utilized in breeding  
466 wheat and domesticated einkorn. This vast diversity is most effectively managed in pre-breeding with  
467 well-defined core collections. Identifying and in-depth characterizing of such core collections adds  
468 significant value and accessibility to the germplasm. Having a well curated and accurately described  
469 gene bank collection, as done here, is a critical foundation to effectively using this rich diversity for crop  
470 improvement and enhancing the value of gene bank resources.

471

472

473

474 **Author Contributions:**

475 JP and JR designed the experiment and conceptualized the study. JR, SW, DW, BE and NS carried out  
476 experiments and data collection, growing of plant materials and germplasm. LA conducted data  
477 analysis. LA and JP wrote the manuscript. All the authors have read and approved the manuscript for  
478 publication.

479

480 **Funding information**

481 This material is based upon work supported by the National Science Foundation and Industry Partners  
482 under Award No. (1822162) “Phase II IUCRC at Kansas State University Center for Wheat Genetic  
483 Resources” and the National Science Foundation under Grant No. (1339389) “GPF-PG: Genome  
484 Structure and Diversity of Wheat and Its Wild Relatives”. Any opinions, findings, and conclusions or  
485 recommendations expressed in this material are those of the author(s) and do not necessarily reflect the  
486 views of the National Science Foundation or industry partners.

487

## 488 **Materials and Methods**

489

### 490 **Plant Resources**

491 This study included 930 accessions of the A-genome diploid wheat species maintained in the WGRC  
492 gene bank (Supplemental Table S1), which were primarily acquired from the Near East, Transcaucasia,  
493 and the Balkans (Figure 1). Most of the A-genome accessions (~ 85%) tested include those initially  
494 collected by B. Lennert Johnson, University of California–Riverside in the 1960s and 1970s. The  
495 remaining accessions were obtained from gene banks in Japan (22), Germany (24), and ICARDA (61).  
496 Several accessions were donated by Robert Metzger, USDA, Oregon State University, Corvallis (26),  
497 seven were collected by the WGRC, and the remainder (10) from other sources. We also tested 225  
498 CIMMYT wheat lines (Supplementary Table S1) genotyped earlier with GBS SNPs (Gao et al., 2021)  
499 thereby inferring the genetic relationships between A-genome diploids and the wheat.

500

### 501 **Genotypic Characterization**

502 The tested accessions were grown as single plants in the greenhouse and tissue collected in 96-well  
503 plates. The tissues were lyophilized for ~3 days and ground to a fine powder using Retsch mixer mill  
504 MM 400. Genomic DNA extraction and GBS library preparation steps were according to Singh et al.  
505 (2019). We had total four multiplexed GBS libraries including one for the pilot study. The pilot study  
506 GBS library was 384-plex, whereas the other GBS libraries were 288-plex. We sequenced on the  
507 Illumina platform with 150 bp pair-end reads (PE150). We had total The information about GBS of 226  
508 CIMMYT lines can be obtained (Gao et al., 2021).

509

510 The TASSEL5 GBSv2 pipeline was used for sequence data processing and genotype calling (Glaubitz et  
511 al., 2014). Reads were aligned to a *T. urartu* pseudomolecule reference (Ling et al., 2018) using  
512 bowtie2 alignment (Ling et al., 2018) and exported to variant call format (VCF). Filtering of the VCF  
513 was done for bi-allelic SNPs using the Fisher exact test with a threshold p-value <0.001 as described  
514 previously (Poland et al., 2012b) considering that the genotypes should represent biallelic variants in  
515 inbred accessions. Genotypes for accessions across all A-genome species were called together, followed  
516 by extracting variants segregating within each species using VCFtools (Danecek et al., 2011). The SNPs  
517 were filtered for minor allele frequency (MAF) > 0.01, missing percentage < 30%, and heterozygous  
518 genotypes < 10% at the population level using TASSEL and R (R Core Team 2019).

519

520 The A-genome diploids and wheat lines were genotyped together calling SNP on A-genome of wheat  
521 reference genome of cultivar Chinese Spring (iwgsc\_refseqv1.0) (Appels et al., 2018). We also filtered  
522 these SNPs using aforementioned criteria. The unrooted neighbor-joining (NJ) phylogenetic tree of A-  
523 genome diploid and wheat lines were generated for investigating the genetic relationship. We followed  
524 approach of Singh *et al.* (2019) to generate NJ tree from GBS sampled population, where clustering was  
525 conducted with default parameters of R packages ‘dist’, ‘ape’, and ‘phyclust’.

526

### 527 **Gene Bank Curation**

528 A-genome species in the WGRC gene bank were curated to identify misclassified and duplicate  
529 accessions. The misclassified accessions identified based on the genetic properties were compared with  
530 accessions in the adjusted class morphologically to assure if they were previously assigned or  
531 documented to the wrong class. Furthermore, to confirm the ploidy of the misclassified accessions that  
532 were grouped far from the major *T. urartu* clade and did not exhibit a closer relationship with any  
533 diploid A-genome in genetic tree, chromosome counts were made by staining with 4',6-diamidino-2-  
534 phenylindole (DAPI). The detail method for chromosome count was obtained (Koo et al., 2017).

535

536 The genetically identical accessions were identified using pairwise allele matching across homozygous  
537 and non-missing sites. We first analyzed the loci identity proportions distribution at genome-wide scale  
538 including every possible pair-wise comparison among accessions within a single species. A threshold for  
539 allele matching percentage given discrepancies for sequencing errors was then detected by finding a  
540 point that separates the local maxima existing around the perfect identity (100%). The identity matrix  
541 and percentage allele matching were computed in R using a custom script as described by (Singh et al.,  
542 2019). The morphological similarity and the geographical relations of the identified duplicate accessions  
543 were checked for confirmation. Glume color (level of darkness) was used as a morphological marker for  
544 cross-validation to affirm the accessions in a duplicate set have the same or similar phenotypes. The  
545 variation in glume color was rated from completely white (0) to dark black (9).

546

### 547 **Population Structure**

548 Population structure of A-genome wheat species was analyzed using fastStructure (Raj et al., 2014).  
549 The fastStructure was initially run at K=2 to K=12 with three replications using ‘simple’ prior where K

550 refers to number of population or model complexity. For the optimum value of K, the program was run  
551 using ‘logistic’ prior at K=2 to K=7 with three replications (Singh et al., 2019). An appropriate number  
552 of K was also obtained using the fastStructure provided utility tool, chooseK.py. The fastStructure  
553 output was graphically visualized using an R package POPHELPER (Francis, 2017). Passport  
554 information including the classification based on morphology, and the accessions geographical sites  
555 were used to group and reorder the samples in population analysis. Accessions that were identified as  
556 misclassified were confirmed through morphological evaluation and reordered to subspecies based on  
557 the genotype-based grouping and the final result was plotted.

558

559 Phylogenetic clustering was carried out in R using ‘dist’ function and ‘ape’ and ‘phyclust’ packages  
560 (Singh et al., 2019). The branches of an unrooted neighbor-joining (NJ) tree were first colored using the  
561 morphology-based classification, and then according to genotype analysis. The morphology-based  
562 coloring was particularly focused in identifying misclassified accessions. A-genome species population  
563 genetic structure was also dissected using principal component analysis (PCA) of genomic data. For  
564 PCA, we estimated the eigenvalues and eigenvectors on R using the ‘e’ function in ‘A’ matrix obtained  
565 from the rrBLUP (Endelman, 2011; Singh et al., 2019).

566

### 567 **Analysis of Genetic Diversity**

568 A-genome species genetic diversity was assessed by computing the Nei’s diversity index (Nei 1973)  
569 using filtered genotyping markers (Nei, 1973). We computed the Nei’s indices of (1) all A-genome  
570 accessions together, (2) each species and subspecies independently, (3) the races within the subspecies,  
571 and (4) and the core collections. The minor allele frequency (MAF) for each species was also plotted to  
572 discern the excess of rare variants in respective population. Number of segregating loci per group were  
573 determined (Table 1). A pairwise fixation index ( $F_{ST}$ ) (Nei, 1987) also was computed between the  
574 species and subgroups separated by the population analysis (Singh et al., 2019).

575

### 576 **$F_{ST}$ Within Einkorn and Selection signature**

577 We computed a genome-wide  $F_{ST}$  statistic for variants within the einkorn group using R (R Core Team  
578 2019) as described (Porto-Neto et al., 2013). This method compute  $F_{ST}$  statistic based on pure drift  
579 model (Nicholson et al., 2002). We also compared the output by computing the Cockerham and Weir  
580  $F_{ST}$  statistic (Weir & Cockerham, 1984) using VCFtools (Danecek et al., 2011). The *T. monococcum*

581 VCF file with biallelic variant was further filtered keeping SNPs with MAF > 0.01, missing < 30% and  
582 heterozygous < 10% followed by imputation using Beagle 5.1 (Browning et al., 2018). The filtered and  
583 imputed genotyping information was used to derive the  $F_{ST}$  values. To balance the population sizes of  
584 domesticated and wild einkorn, we randomly chose 145 wild einkorn accessions to match the number of  
585 145 domesticated accessions. The  $F_{ST}$  were plotted using ggplot2 in R (R Core Team 2019) and the raw  
586  $F_{ST}$  plots were smoothed using Lowess method (Pintus et al., 2014) to find the genomic regions with  
587 extreme  $F_{ST}$ . To define the selection signal peak, we considered outlier  $F_{ST}$  values that were more than  
588 three standard deviation ( $3\sigma$ ) over genome wide average as the threshold.

589

### 590 **Core Collections**

591 Core collections of *T. urartu*, and *T. monococcum* (wild and domesticated einkorn) were selected taking  
592 allelic diversity, genotype coverage, geographical representation, and phenotypic variation (glume color)  
593 into consideration. From the filtered genotyping file, heterozygous genotypes were masked before  
594 running the core accessions selection software GenoCore (Jeong et al., 2017). We ran GenoCore with  
595 the default parameters: -d 0.01% and -cv 99%. The positions of the selected samples within the  
596 phylogenetic tree and PCA clusters were observed through coloring the selected core accessions versus  
597 all other samples. Also, the geographical representations were evaluated marking the selected vs.  
598 remaining accessions in the google map using GPS Visualizer (<https://www.gpsvisualizer.com>). To  
599 ensure phenotypic variations in the selected core sets, we considered the glume color score  
600 (Supplementary Table S2) as a reference variation. The Nei's diversity index (1987) of core sets were  
601 also computed (Danecek et al., 2011).

602

603

604 **Accession Numbers**

605

606 Raw sequence data obtained from GBS, the fastq files, has been deposited at the National Center for  
607 Biotechnology Information (NCBI) SRA database with the BioProject accession PRJNA744683  
608 (<https://www.ncbi.nlm.nih.gov/sra/PRJNA744683>). The GBS key file with required information for  
609 demultiplexing and further detail about the SRA deposited fastq files can be obtained at Dryad digital  
610 repository (doi:10.5061/dryad.9zw3r22f6).

611

612

613 **Supplemental Data**

614

615 **Supplementary Table S1.** List of A-genome accessions, their origin and duplicated accessions.

616

617 **Supplementary Table S2.** Core collections of A-genome species.

618

619 **Supplementary Table S3.** The misclassified A-genome species accessions, their previous class based  
620 on morphology and the updated class/group based on the genotyping.

621

622 **Supplementary Table S4.** Number of accessions with common PI numbers that clustered in  
623 corresponding groups in this experiment and a past experiment. Both studies tested only a portion of  
624 germplasms from USDA. The  $\alpha$ ,  $\beta$ , and  $\gamma$  races indicate the three genetic clusters within the wild einkorn  
625 as designated in the past study. The \* indicates the accessions that we detected as misclassified and need  
626 adjustment of class. Past study also grouped these accessions in the same group that we observed,  
627 however, they did not discuss on misclassification issue and just listed the accessions based on  
628 morphological classification.

629

630 **Supplementary Table S5.** Pairwise  $F_{ST}$  coefficients among the subgroups within  $\alpha$  race of subsp.

631 *aegilopoides* (wild einkorn) and the admixture groups. There were three subgroups (Turkey, Duhok,

632 Erbil) and two admixture groups (Iran and Sulaymaniyah (Iraq)).

633

634 **Supplementary Figure S1.** The *T. urartu* clade and subsp. *aegilopoides*  $\alpha$  race clade in the unrooted NJ  
635 tree highlighting the misclassified accessions between the two groups. The red branches within the gold-  
636 colored clade and the gold branches within the red clade reflect the misclassified accessions.

637



638 **Supplementary Figure S2.** Threshold determination for declaring duplicate accessions identification.  
639 (A) Percentage identity versus the number of comparisons among 204 accessions in *T. urartu* (D)  
640 Percentage identity versus the number of pairwise comparisons for the accession pairs in *T. urartu* that  
641 had near perfect ( $\geq 99\%$ ) identity.

642  
643 **Supplementary Figure S3.** An unrooted Neighbor-Joining (NJ) tree of wheat and A-genome species: *T.*  
644 *urartu*, subsp. *aegilopoides*, and subsp. *monococcum*. The tree branches are colored based on the genetic  
645 grouping of the accessions after correcting misclassified accessions. *T. urartu* (yellow), domesticated  
646 einkorn (red), wild einkorn race  $\alpha$  (blue), and wild einkorn race  $\gamma$  (green), and misclassified tetraploids  
647 (brown) are shown.

648  
649 **Supplementary Figure S4.** The mitotic metaphase cell of a misclassified wild wheat accession in  
650 WGRC collection, TA10881 confirming the accession as tetraploid ( $2n=4x=28$ ) and thus verified the  
651 GBS based genetic grouping. Chromosomes were stained with 4',6-diamidino-2-phenylindole (DAPI).  
652 Before genotyping and cytological confirmation, the accession was falsely grouped under *T. urartu*.

653  
654 **Supplementary Figure S5.** Principle component analysis (PCA) plot for A-genome wheat species with  
655 two major PCs. There were three races  $\alpha$ ,  $\gamma$  and  $\beta$  within the wild einkorn group which clustered  
656 separately in population analysis.

657  
658 **Supplementary Figure S6.** Minor allele frequency plots of A-genome diploid species: (a) *T.*  
659 *monococcum* subsp. *aegilopoides*, (b) *T. monococcum* subsp. *monococcum*, and (c) *T. urartu*

660  
661 **Supplementary Figure S7.** Smoothed  $F_{ST}$  curve showing selection signal for einkorn wheat on  
662 chromosome 3A. The strongest signal was located at 60-90 Mb. The horizontal green line indicates the  
663 selection signature determination genome-wide threshold (0.24), which is  $3\sigma$  above the mean. The red  
664 vertical line at 62 Mb on chromosome 3A indicates the location of candidate selection signature Btr1.

665  
666 **Supplementary Figure S8.** An unrooted NJ phylogenetic tree of A-genome wheat species showing the  
667 accessions in the core collections and all other accessions in respective clades. Black branch reflects the  
668 accessions in the core collection, and the golden branch indicates all other accessions that are not in the  
669 core collections.

670 **Supplementary Figure S9.** Principle component analysis (PCA) plot of A-genome wheat accessions  
671 showing partitioning of different groups within the species and the accessions selected in the genetic  
672 cores (black triangles).

673

674 **Supplementary Figure S10.** Geographic map of A-genome wheat accessions, where the core  
675 accessions were indicated by larger google marks and the rest of the accessions were shown by smaller  
676 marks of the respective groups.

677

678 **Supplementary Figure S11.** Diagram showing three different taxonomic classification systems of  
679 einkorn wheat. In WGRC, we follow the taxonomic classification system of Van Slageren (1994).

680

681 **Supplementary text S1.** Coding sequence of gene for non-brittle rachis 1 (Btr1) in *T. monococcum*  
682 subsp. *monococcum*

683

#### 684 **Acknowledgements**

685 We would like to thank the wheat genetic resource center (WGRC) gene bank for collecting and  
686 maintaining these A-genome species.

687

688 Authors have no competing interests

689

690 All data are available in the manuscript or the supplementary resources

691

692

693

694

695

696

697

698

699

700

701

702 **Table 1.** A-genome species and sub-species groups with number of samples, the Nei's diversity indices,  
 703 and number of segregating loci. The percentage of segregating SNPs for core set groups were estimated  
 704 relative to the segregating loci within the respective groups.

705

| Group                                                             | Number of<br>Samples | Diversity<br>Index | Segregating<br>SNPs  |
|-------------------------------------------------------------------|----------------------|--------------------|----------------------|
| <b>A-genome species (<i>T. monococcum</i> + <i>T. urartu</i>)</b> | <b>925</b>           | <b>0.25</b>        | <b>13089</b>         |
| <i>T. monococcum</i> (einkorn)                                    | 729                  | 0.106              | 6587 (50.3%)         |
| Domesticated einkorn (subsp. <i>monococcum</i> )                  | 145                  | 0.058              | 3637 (27.8%)         |
| Wild einkorn (subsp. <i>aegilopoides</i> )                        | 584                  | 0.086              | 6213 (47.4%)         |
| $\alpha$ race einkorn                                             | 524                  | 0.073              | 5119 (39.1%)         |
| $\gamma$ race einkorn                                             | 48                   | 0.093              | 4440 (33.9%)         |
| $\beta$ race einkorn                                              | 12                   | 0.058              | 2622 (20.1%)         |
| <i>T. urartu</i>                                                  | 196                  | 0.069              | 4072 (31.11%)        |
| <b>A-genome species core set</b>                                  | <b>79</b>            | <b>0.271</b>       | <b>12907 (98.6%)</b> |
| <i>T. monococcum</i> core                                         | 60                   | 0.116              | 5926 (89.9%)         |
| Wild einkorn core                                                 | 41                   | 0.098              | 5324 (85.6%)         |
| Domesticated einkorn core                                         | 19                   | 0.065              | 3039 (83.6%)         |
| <i>T. urartu</i> core                                             | 19                   | 0.072              | 3324 (81.6%)         |

706

707

708 **Table 2.** Pairwise  $F_{ST}$  coefficients among the A-genome wheat species. Higher  $F_{ST}$  reflects a stronger  
709 population differentiation. The  $\alpha$ ,  $\beta$  and  $\gamma$  genetic races comprise the wild einkorn (*T. monococcum*  
710 subsp. *aegilopoides* L.).

711

|                          | $\alpha$ race | $\gamma$ race | $\beta$ race | <i>T. urartu</i> |
|--------------------------|---------------|---------------|--------------|------------------|
| subsp. <i>monococcum</i> | 0.56          | 0.41          | 0.31         | 0.87             |
| $\alpha$ race            | -             | 0.40          | 0.50         | 0.86             |
| $\gamma$ race            | -             | -             | 0.37         | 0.83             |
| $\beta$ race             | -             | -             | -            | 0.86             |

712

713

714 **Table 3.** Number (#) of unique accessions, number of accessions in a duplicate set consisting maximum  
715 identical accessions, and total accessions of A-genome species: *T. urartu*, domesticated einkorn (subsp.  
716 *monococcum*), and wild einkorn (subsp. *aegilopoides*) three genetic races:  $\alpha$ ,  $\gamma$ , and  $\beta$ . The identical  
717 accessions were detected using pairwise allele matching.  
718

|                          | $\alpha$ race      | $\gamma$ race   | $\beta$ race     | subsp. <i>monococcum</i> | <i>T. urartu</i>  |
|--------------------------|--------------------|-----------------|------------------|--------------------------|-------------------|
| <b>Total accessions</b>  | <b>524</b>         | <b>48</b>       | <b>12</b>        | <b>145</b>               | <b>196</b>        |
| # Loci compared          | 4112               | 4112            | 4112             | 3337                     | 6356              |
| Max duplicates set       | 28                 | 3               | 0                | 5                        | 39                |
| <b>Unique accessions</b> | <b>198 (37.8%)</b> | <b>37 (77%)</b> | <b>12 (100%)</b> | <b>97 (66.8%)</b>        | <b>61 (31.2%)</b> |

719

720

721

722

723

## 724 **Figure Legends**

---

725

726 **Figure 1.** Geographic distribution of A-genome wheat species in the WGRC gene bank. Collection sites  
727 of accessions in this study are designated for domesticated einkorn (*Triticum monococcum* subsp.  
728 *monococcum*) (red);  $\alpha$  race within wild einkorn (*T. monococcum* subsp. *aegilopoides*) (blue);  $\gamma$  race  
729 wild einkorn (orange);  $\beta$  race wild einkorn (magenta); and *T. urartu* (yellow).

730

731 **Figure 2.** Population structure of A-genome wheat species: *Triticum monococcum* L. and *T. urartu*.  
732 Subpopulations were determined using fastStructure at K=2 to K=7. Each color represents a population,  
733 and each bar indicates the admixture proportion of an individual accession from K populations. The  
734 subgroup within  $\alpha$ , which is exemplified by yellow color sole includes the accessions from Erbil (also  
735 spelled Arbil), Iraq, whereas the subgroup embodied by red color only comprises the accessions from  
736 Duhok (ancient name ‘Dahuk’, Iraq). The bars with purple color only represent the accessions from  
737 southeast Turkey (ST). Other admixture types within  $\alpha$  included accessions were from Iran, SU  
738 (Sulaymaniyah (Iraq)), random different sites (D) and unknown sites (U) as indicated. Within *T. urartu*,  
739 the LE group represents accessions from Lebanon, the TU includes accession from Turkey, S indicates  
740 accessions from Syria and M shows accessions from mixed sites.

741

742 **Figure 3.** An unrooted Neighbor-Joining (NJ) tree of A-genome species: *T. urartu*, subsp. *aegilopoides*,  
743 and subsp. *monococcum*. The tree branches are colored based on the genetic grouping of the accessions  
744 after correcting misclassified accessions. *T. urartu* (yellow), domesticated einkorn (red), wild einkorn  
745 race  $\alpha$  (blue), and wild einkorn race  $\gamma$  (green) are shown.

746

747 **Figure 4.** Relationship between the allele coverage as estimated using GenoCore and the number of  
748 samples selected in the core for einkorn group (*T. monococcum*). The threshold for 60 accessions at  
749 approximately 90% genotype coverage is shown with vertical red line.

750

751

752

753

## References

754

755 Appels, R., Eversole, K., Feuillet, C., Keller, B., Rogers, J., Stein, N., Pozniak, C. J., Stein, N., Choulet, F.,  
756 Distelfeld, A., Eversole, K., Poland, J., Rogers, J., Ronen, G., Sharpe, A. G., Pozniak, C., Ronen, G.,  
757 Stein, N., Barad, O., Baruch, K., Choulet, F., Keeble-Gagnère, G., Mascher, M., Sharpe, A. G.,  
758 Ben-Zvi, G., Josselin, A. A., Stein, N., Mascher, M., Himmelbach, A., Choulet, F., Keeble-Gagnère,  
759 G., Mascher, M., Rogers, J., Balfourier, F., Gutierrez-Gonzalez, J., Hayden, M., Josselin, A. A.,  
760 Koh, C., Muehlbauer, G., Pasam, R. K., Paux, E., Pozniak, C. J., Rigault, P., Sharpe, A. G., Tibbits,  
761 J., Tiwari, V., Choulet, F., Keeble-Gagnère, G., Mascher, M., Josselin, A. A., Rogers, J., Spannagl,  
762 M., Choulet, F., Lang, D., Gundlach, H., Haberer, G., Keeble-Gagnère, G., Mayer, K. F. X.,  
763 Ormanbekova, D., Paux, E., Prade, V., Šimková, H., Wicker, T., Choulet, F., Spannagl, M.,  
764 Swarbreck, D., Rimbart, H., Felder, M., Guilhot, N., Gundlach, H., Haberer, G., Kaithakottil, G.,  
765 Keilwagen, J., Lang, D., Leroy, P., Lux, T., Mayer, K. F. X., Twardziok, S., Venturini, L., Appels, R.,  
766 Rimbart, H., Choulet, F., Juhász, A., Keeble-Gagnère, G., Choulet, F., Spannagl, M., Lang, D.,  
767 Abrouk, M., Haberer, G., Keeble-Gagnère, G., Mayer, K. F. X., Wicker, T., Choulet, F., Wicker, T.,  
768 Gundlach, H., Lang, D., Spannagl, M., Lang, D., Spannagl, M., Appels, R., Fischer, I., Uauy, C.,  
769 Borrill, P., Ramirez-Gonzalez, R. H., Appels, R., Arnaud, D., Chalabi, S., Chalhoub, B., Choulet, F.,  
770 Cory, A., Datla, R., Davey, M. W., Hayden, M., Jacobs, J., Lang, D., Robinson, S. J., Spannagl, M.,  
771 Steuernagel, B., Tibbits, J., Tiwari, V., van Ex, F., Wulff, B. B. H., Pozniak, C. J., Robinson, S. J.,  
772 Sharpe, A. G., Cory, A., Benhamed, M., Paux, E., Bendahmane, A., Concia, L., Latrasse, D.,  
773 Rogers, J., Jacobs, J., Alaux, M., Appels, R., Bartoš, J., Bellec, A., Berges, H., Doležel, J., Feuillet,  
774 C., Frenkel, Z., Gill, B., Korol, A., Letellier, T., Olsen, O. A., Šimková, H., Singh, K., Valárik, M., van  
775 der Vossen, E., Vautrin, S., Weining, S., Korol, A., Frenkel, Z., Fahima, T., Glikson, V., Raats, D.,  
776 Rogers, J., Tiwari, V., Gill, B., Paux, E., Poland, J., Doležel, J., Číhalíková, J., Šimková, H.,  
777 Toegelová, H., Vrána, J., Sourdille, P., Darrier, B., Appels, R., Spannagl, M., Lang, D., Fischer, I.,  
778 Ormanbekova, D., Prade, V., Barabaschi, D., Cattivelli, L., Hernandez, P., Galvez, S., Budak, H.,  
779 Steuernagel, B., Jones, J. D. G., Witek, K., Wulff, B. B. H., Yu, G., Small, I., Melonek, J., Zhou, R.,  
780 Juhász, A., Belova, T., Appels, R., Olsen, O. A., Kanyuka, K., King, R., Nilsen, K., Walkowiak, S.,  
781 Pozniak, C. J., Cuthbert, R., Datla, R., Knox, R., Wiebe, K., Xiang, D., Rohde, A., Golds, T., Doležel,  
782 J., Čížková, J., Tibbits, J., Budak, H., Akpinar, B. A., Biyiklioglu, S., Muehlbauer, G., Poland, J.,  
783 Gao, L., Gutierrez-Gonzalez, J., N'Daiye, A., Doležel, J., Šimková, H., Číhalíková, J., Kubaláková,  
784 M., Šafář, J., Vrána, J., Berges, H., Bellec, A., Vautrin, S., Alaux, M., Alfama, F., Adam-Blondon, A.  
785 F., Flores, R., Guerche, C., Letellier, T., Loaec, M., Quesneville, H., Pozniak, C. J., Sharpe, A. G.,  
786 Walkowiak, S., Budak, H., Condie, J., Ens, J., Koh, C., Maclachlan, R., Tan, Y., Wicker, T., Choulet,  
787 F., Paux, E., Alberti, A., Aury, J. M., Balfourier, F., Barbe, V., Couloux, A., Cruaud, C., Labadie, K.,  
788 Mangenot, S., Wincker, P., Gill, B., Kaur, G., Luo, M., Sehgal, S., Singh, K., Chhuneja, P., Gupta, O.  
789 P., Jindal, S., Kaur, P., Malik, P., Sharma, P., Yadav, B., Singh, N. K., Khurana, J., Chaudhary, C.,  
790 Khurana, P., Kumar, V., Mahato, A., Mathur, S., Sevanthi, A., Sharma, N., Tomar, R. S., Rogers, J.,  
791 Jacobs, J., Alaux, M., Bellec, A., Berges, H., Doležel, J., Feuillet, C., Frenkel, Z., Gill, B., Korol, A.,  
792 van der Vossen, E., Vautrin, S., Gill, B., Kaur, G., Luo, M., Sehgal, S., Bartoš, J., Holušová, K.,  
793 Plíhal, O., Clark, M. D., Heavens, D., Kettleborough, G., Wright, J., Valárik, M., Abrouk, M.,  
794 Balcárková, B., Holušová, K., Hu, Y., Luo, M., Salina, E., Ravin, N., Skryabin, K., Beletsky, A.,  
795 Kadnikov, V., Mardanov, A., Nesterov, M., Rakitin, A., Sergeeva, E., Handa, H., Kanamori, H.,



- 796 Katagiri, S., Kobayashi, F., Nasuda, S., Tanaka, T., Wu, J., Appels, R., Hayden, M., Keeble-  
797 Gagnère, G., Rigault, P., Tibbits, J., Olsen, O. A., Belova, T., Cattonaro, F., Jiumeng, M., Kugler, K.,  
798 Mayer, K. F. X., Pfeifer, M., Sandve, S., Xun, X., Zhan, B., Šimková, H., Abrouk, M., Batley, J.,  
799 Bayer, P. E., Edwards, D., Hayashi, S., Toegelová, H., Tulpová, Z., Visendi, P., Weining, S., Cui, L.,  
800 Du, X., Feng, K., Nie, X., Tong, W., Wang, L., Borrill, P., Gundlach, H., Galvez, S., Kaithakottil, G.,  
801 Lang, D., Lux, T., Mascher, M., Ormanbekova, D., Prade, V., Ramirez-Gonzalez, R. H., Spannagl,  
802 M., Stein, N., Uauy, C., Venturini, L., Stein, N., Appels, R., Eversole, K., Rogers, J., Borrill, P.,  
803 Cattivelli, L., Choulet, F., Hernandez, P., Kanyuka, K., Lang, D., Mascher, M., Nilsen, K., Paux, E.,  
804 Pozniak, C. J., Ramirez-Gonzalez, R. H., Šimková, H., Small, I., Spannagl, M., Swarbreck, D., &  
805 Uauy, C. (2018). Shifting the limits in wheat research and breeding using a fully annotated  
806 reference genome. *Science*, 361(6403). <https://doi.org/10.1126/science.aar7191>
- 807 Bashalkhanov, S., Pandey, M., & Rajora, O. P. (2009). A simple method for estimating genetic diversity  
808 in large populations from finite sample sizes. *BMC Genetics*, 10(1), 84.  
809 <https://doi.org/10.1186/1471-2156-10-84>
- 810 Brandolini, A., & Heun, M. (2019). Genetics of brittleness in wild, domesticated and feral einkorn wheat  
811 (*Triticum monococcum* L.) and the place of origin of feral einkorn. *Genetic Resources and Crop*  
812 *Evolution*, 66(2), 429-439. <https://doi.org/10.1007/s10722-018-0721-7>
- 813 Brandolini, A., Volante, A., & Heun, M. (2016). Geographic differentiation of domesticated einkorn  
814 wheat and possible Neolithic migration routes. *Heredity*, 117(3), 135-141.  
815 <https://doi.org/10.1038/hdy.2016.32>
- 816 Browning, B. L., Zhou, Y., & Browning, S. R. (2018). A One-Penny Imputed Genome from Next-  
817 Generation Reference Panels. *The American Journal of Human Genetics*, 103(3), 338-348.  
818 <https://doi.org/https://doi.org/10.1016/j.ajhg.2018.07.015>
- 819 Brunazzi, A., Scaglione, D., Talini, R. F., Miculan, M., Magni, F., Poland, J., Enrico Pè, M., Brandolini, A.,  
820 & Dell'Acqua, M. (2018). Molecular diversity and landscape genomics of the crop wild relative  
821 *Triticum urartu* across the Fertile Crescent. *The Plant Journal*, 94(4), 670-684.  
822 <https://doi.org/10.1111/tpj.13888>
- 823 Charmet, G. (2011). Wheat domestication: Lessons for the future. *Comptes Rendus Biologies*, 334(3),  
824 212-220. <https://doi.org/https://doi.org/10.1016/j.crv.2010.12.013>
- 825 Chen, S., Guo, Y., Briggs, J., Dubach, F., Chao, S., Zhang, W., Rouse, M. N., & Dubcovsky, J. (2018).  
826 Mapping and characterization of wheat stem rust resistance genes SrTm5 and Sr60 from  
827 *Triticum monococcum*. *Theoretical and Applied Genetics*, 131(3), 625-635.  
828 <https://doi.org/10.1007/s00122-017-3024-z>
- 829 Comai, L. (2005). The advantages and disadvantages of being polyploid. *Nature Reviews Genetics*,  
830 6(11), 836-846. <https://doi.org/10.1038/nrg1711>
- 831 Danecek, P., Auton, A., Abecasis, G., Albers, C. A., Banks, E., DePristo, M. A., Handsaker, R. E., Lunter,  
832 G., Marth, G. T., Sherry, S. T., McVean, G., Durbin, R., & Group, G. P. A. (2011). The variant call  
833 format and VCFtools. *Bioinformatics*, 27(15), 2156-2158.  
834 <https://doi.org/10.1093/bioinformatics/btr330>
- 835 Díez, M. J., De la Rosa, L., Martín, I., Guasch, L., Cartea, M. E., Mallor, C., Casals, J., Simó, J., Rivera, A.,  
836 Anastasio, G., Prohens, J., Soler, S., Blanca, J., Valcárcel, J. V., & Casañas, F. (2018). Plant  
837 Genebanks: Present Situation and Proposals for Their Improvement. the Case of the Spanish  
838 Network [Policy and Practice Reviews]. *Frontiers in Plant Science*, 9(1794).  
839 <https://doi.org/10.3389/fpls.2018.01794>

- 840 Dong, L., Huo, N., Wang, Y., Deal, K., Luo, M.-C., Wang, D., Anderson, O. D., & Gu, Y. Q. (2012).  
841 Exploring the diploid wheat ancestral A genome through sequence comparison at the high-  
842 molecular-weight glutenin locus region. *Molecular Genetics and Genomics*, 287(11), 855-866.  
843 <https://doi.org/10.1007/s00438-012-0721-9>
- 844 Dorofeev, V., Filatenko, A., Migušova, E., Udačin, R., & Jakubciner, M. (1979). Pšenica (Wheat). *Kolos*,  
845 *Leningrad*.
- 846 Dvořák, J., Terlizzi, P. d., Zhang, H.-B., & Resta, P. (1993). The evolution of polyploid wheats:  
847 identification of the A genome donor species. *Genome*, 36(1), 21-31.  
848 <https://doi.org/10.1139/g93-004> %M 18469969
- 849 Empilli, S., Castagna, R., & Brandolini, A. (2000). Morpho-agronomic variability of the diploid wheat  
850 *Triticum monococcum* L. *Plant Genetic Resources Newsletter*(No. 124), 36-40.
- 851 Endelman, J. B. (2011). Ridge Regression and Other Kernels for Genomic Selection with R Package  
852 rrBLUP. *The Plant Genome*, 4(3), 250-255. <https://doi.org/10.3835/plantgenome2011.08.0024>
- 853 Feldman, M., & Levy, A. A. (2012). Genome evolution due to allopolyploidization in wheat. *Genetics*,  
854 192(3), 763-774. <https://doi.org/10.1534/genetics.112.146316>
- 855 Francis, R. M. (2017). pophelper: an R package and web app to analyse and visualize population  
856 structure. *Molecular Ecology Resources*, 17(1), 27-32. <https://doi.org/10.1111/1755-0998.12509>
- 857
- 858 Fricano, A., Brandolini, A., Rossini, L., Sourdille, P., Wunder, J., Effgen, S., Hidalgo, A., Erba, D., Piffanelli,  
859 P., & Salamini, F. (2014). Crossability of *Triticum urartu* and *Triticum monococcum* wheats,  
860 homoeologous recombination, and description of a panel of interspecific introgression lines. *G3*  
861 (*Bethesda, Md.*), 4(10), 1931-1941. <https://doi.org/10.1534/g3.114.013623>
- 862 Gao, L., Koo, D.-H., Juliana, P., Rife, T., Singh, D., Lemes da Silva, C., Lux, T., Dorn, K. M., Clinesmith, M.,  
863 Silva, P., Wang, X., Spannagl, M., Monat, C., Friebe, B., Steuernagel, B., Muehlbauer, G. J.,  
864 Walkowiak, S., Pozniak, C., Singh, R., Stein, N., Mascher, M., Fritz, A., & Poland, J. (2021). The  
865 *Aegilops ventricosa* 2NvS segment in bread wheat: cytology, genomics and breeding.  
866 *Theoretical and Applied Genetics*, 134(2), 529-542. [https://doi.org/10.1007/s00122-020-03712-](https://doi.org/10.1007/s00122-020-03712-y)  
867 [y](https://doi.org/10.1007/s00122-020-03712-y)
- 868 Glaubitz, J. C., Casstevens, T. M., Lu, F., Harriman, J., Elshire, R. J., Sun, Q., & Buckler, E. S. (2014).  
869 TASSEL-GBS: A High Capacity Genotyping by Sequencing Analysis Pipeline. *PloS one*, 9(2),  
870 e90346. <https://doi.org/10.1371/journal.pone.0090346>
- 871 Goncharov, N. P. (2011). Genus *Triticum* L. taxonomy: the present and the future. *Plant Systematics*  
872 *and Evolution*, 295(1), 1-11. <https://doi.org/10.1007/s00606-011-0480-9>
- 873 Harlan, J. R., & Zohary, D. (1966). Distribution of Wild Wheats and Barley. *Science*, 153(3740), 1074-  
874 1080. <https://doi.org/10.1126/science.153.3740.1074>
- 875 Heun, M., Schäfer-Pregl, R., Klawan, D., Castagna, R., Accerbi, M., Borghi, B., & Salamini, F. (1997). Site  
876 of Einkorn Wheat Domestication Identified by DNA Fingerprinting. *Science*, 278(5341), 1312-  
877 1314. <https://doi.org/10.1126/science.278.5341.1312>
- 878 Jeong, S., Kim, J.-Y., Jeong, S.-C., Kang, S.-T., Moon, J.-K., & Kim, N. (2017). GenoCore: A simple and fast  
879 algorithm for core subset selection from large genotype datasets. *PloS one*, 12(7), e0181420.  
880 <https://doi.org/10.1371/journal.pone.0181420>
- 881 Key, M. J. (1954). The taxonomy of hexaploid wheat. *Svensk Bot Tidskr*, 48, 579–590.
- 882 Kilian, B., Martin, W., & Salamini, F. (2010). Genetic Diversity, Evolution and Domestication of Wheat  
883 and Barley in the Fertile Crescent. In M. Glaubrecht (Ed.), *Evolution in Action: Case studies in*

- 884 *Adaptive Radiation, Speciation and the Origin of Biodiversity* (pp. 137-166). Springer Berlin  
885 Heidelberg. [https://doi.org/10.1007/978-3-642-12425-9\\_8](https://doi.org/10.1007/978-3-642-12425-9_8)
- 886 Kilian, B., Özkan, H., Walther, A., Kohl, J., Dagan, T., Salamini, F., & Martin, W. (2007). Molecular  
887 Diversity at 18 Loci in 321 Wild and 92 Domesticated Lines Reveal No Reduction of Nucleotide  
888 Diversity during *Triticum monococcum* (Einkorn) Domestication: Implications for the Origin of  
889 Agriculture. *Molecular Biology and Evolution*, 24(12), 2657-2668.  
890 <https://doi.org/10.1093/molbev/msm192>
- 891 Kolmer, J. A., Anderson, J. A., & Flor, J. M. (2010). Chromosome Location, Linkage with Simple  
892 Sequence Repeat Markers, and Leaf Rust Resistance Conditioned by Gene Lr63 in Wheat. *Crop  
893 Science*, 50(6), 2392-2395. <https://doi.org/10.2135/cropsci2010.01.0005>
- 894 Koo, D.-H., Liu, W., Friebe, B., & Gill, B. S. (2017). Homoeologous recombination in the presence of Ph1  
895 gene in wheat. *Chromosoma*, 126(4), 531-540.
- 896 Li, O., Zhao, Y.-y., Guo, N., Lu, C.-y., & Sun, X.-w. (2009). Effects of sample size and loci number on  
897 genetic diversity in wild population of grass carp revealed by SSR.
- 898 Ling, H.-Q., Ma, B., Shi, X., Liu, H., Dong, L., Sun, H., Cao, Y., Gao, Q., Zheng, S., Li, Y., Yu, Y., Du, H., Qi,  
899 M., Li, Y., Lu, H., Yu, H., Cui, Y., Wang, N., Chen, C., Wu, H., Zhao, Y., Zhang, J., Li, Y., Zhou, W.,  
900 Zhang, B., Hu, W., van Eijk, M. J. T., Tang, J., Witsenboer, H. M. A., Zhao, S., Li, Z., Zhang, A.,  
901 Wang, D., & Liang, C. (2018). Genome sequence of the progenitor of wheat A subgenome  
902 *Triticum urartu*. *Nature*, 557(7705), 424-428. <https://doi.org/10.1038/s41586-018-0108-0>
- 903 Mac Key, J. (2005a). Wheat: its concept, evolution and taxonomy. *Durum wheat breeding. Current  
904 approaches and future strategies*, 1(part 1), 3-61.
- 905 Mac Key, J. (2005b). Wheat: its concept, evolution, and taxonomy. In *Durum Wheat Breeding* (pp. 35-  
906 94). CRC Press.
- 907 Middleton, C. P., Senerchia, N., Stein, N., Akhunov, E. D., Keller, B., Wicker, T., & Kilian, B. (2014).  
908 Sequencing of chloroplast genomes from wheat, barley, rye and their relatives provides a  
909 detailed insight into the evolution of the Triticeae tribe. *PLoS one*, 9(3), e85761-e85761.  
910 <https://doi.org/10.1371/journal.pone.0085761>
- 911 Mondal, S., Rutkoski, J. E., Velu, G., Singh, P. K., Crespo-Herrera, L. A., Guzmán, C., Bhavani, S., Lan, C.,  
912 He, X., & Singh, R. P. (2016). Harnessing Diversity in Wheat to Enhance Grain Yield, Climate  
913 Resilience, Disease and Insect Pest Resistance and Nutrition Through Conventional and Modern  
914 Breeding Approaches [Review]. *Frontiers in Plant Science*, 7(991).  
915 <https://doi.org/10.3389/fpls.2016.00991>
- 916 Nair, K. P. (2019). Utilizing crop wild relatives to combat global warming. In *Advances in Agronomy* (Vol.  
917 153, pp. 175-258). Elsevier.
- 918 Nei, M. (1973). Analysis of Gene Diversity in Subdivided Populations. *Proceedings of the National  
919 Academy of Sciences*, 70(12), 3321-3323. <https://doi.org/10.1073/pnas.70.12.3321>
- 920 Nei, M. (1987). *Molecular Evolutionary Genetics* Columbia University Press New York 512.
- 921 Nicholson, G., Smith, A. V., Jónsson, F., Gústafsson, Ó., Stefánsson, K., & Donnelly, P. (2002). Assessing  
922 population differentiation and isolation from single-nucleotide polymorphism data. *Journal of  
923 the Royal Statistical Society: Series B (Statistical Methodology)*, 64(4), 695-715.
- 924 Özkan, H., Tuna, M., Kilian, B., Mori, N., & Ohta, S. (2010). Genome size variation in diploid and  
925 tetraploid wild wheats. *AoB PLANTS*, 2010. <https://doi.org/10.1093/aobpla/plq015>
- 926 Pintus, E., Sorbolini, S., Albera, A., Gaspa, G., Dimauro, C., Steri, R., Marras, G., & Macciotta, N. P.  
927 (2014). Use of locally weighted scatterplot smoothing (LOWESS) regression to study selection

- 928 signatures in Piedmontese and Italian Brown cattle breeds. *Anim Genet*, 45(1), 1-11.  
929 <https://doi.org/10.1111/age.12076>
- 930 Poland, J., Endelman, J., Dawson, J., Rutkoski, J., Wu, S., Manes, Y., Dreisigacker, S., Crossa, J., Sánchez-  
931 Villeda, H., & Sorrells, M. (2012b). Genomic selection in wheat breeding using genotyping-by-  
932 sequencing. *The Plant Genome*, 5(3).
- 933 Poland, J. A., Brown, P. J., Sorrells, M. E., & Jannink, J.-L. (2012a). Development of high-density genetic  
934 maps for barley and wheat using a novel two-enzyme genotyping-by-sequencing approach. *PLoS*  
935 *one*, 7(2), e32253-e32253. <https://doi.org/10.1371/journal.pone.0032253>
- 936 Porto-Neto, L. R., Lee, S. H., Lee, H. K., & Gondro, C. (2013). Detection of Signatures of Selection Using  
937 FST. In C. Gondro, J. van der Werf, & B. Hayes (Eds.), *Genome-Wide Association Studies and*  
938 *Genomic Prediction* (pp. 423-436). Humana Press. [https://doi.org/10.1007/978-1-62703-447-  
939 0\\_19](https://doi.org/10.1007/978-1-62703-447-0_19)
- 940 Pourkheirandish, M., Dai, F., Sakuma, S., Kanamori, H., Distelfeld, A., Willcox, G., Kawahara, T.,  
941 Matsumoto, T., Kilian, B., & Komatsuda, T. (2018). On the Origin of the Non-brittle Rachis Trait  
942 of Domesticated Einkorn Wheat [Original Research]. *Frontiers in Plant Science*, 8(2031).  
943 <https://doi.org/10.3389/fpls.2017.02031>
- 944 Raj, A., Stephens, M., & Pritchard, J. K. (2014). fastSTRUCTURE: Variational Inference of Population  
945 Structure in Large SNP Data Sets. *Genetics*, 197(2), 573-589.  
946 <https://doi.org/10.1534/genetics.114.164350>
- 947 Rouse, M. N., & Jin, Y. (2011). Stem Rust Resistance in A-Genome Diploid Relatives of Wheat. *Plant*  
948 *Disease*, 95(8), 941-944. <https://doi.org/10.1094/pdis-04-10-0260>
- 949 Saintenac, C., Zhang, W., Salcedo, A., Rouse, M. N., Trick, H. N., Akhunov, E., & Dubcovsky, J. (2013).  
950 Identification of Wheat Gene *Sr35* That Confers Resistance to Ug99 Stem Rust Race  
951 Group. *Science*, 341(6147), 783-786. <https://doi.org/10.1126/science.1239022>
- 952 Schiemann, E. (1948). Weizen. Roggen, Gerste: Systematik Geschichte und Verwendung, Verlag Gustav  
953 Fischer, Jena, Germany.
- 954 Sheedy, J. G., Thompson, J. P., & Kelly, A. (2012). Diploid and tetraploid progenitors of wheat are  
955 valuable sources of resistance to the root lesion nematode *Pratylenchus thornei*. *Euphytica*,  
956 186(2), 377-391. <https://doi.org/10.1007/s10681-011-0617-5>
- 957 Singh, N., Wu, S., Tiwari, V., Sehgal, S., Raupp, J., Wilson, D., Abbasov, M., Gill, B., & Poland, J. (2019).  
958 Genomic Analysis Confirms Population Structure and Identifies Inter-Lineage Hybrids in  
959 *Aegilops tauschii* [Original Research]. *Frontiers in Plant Science*, 10(9).  
960 <https://doi.org/10.3389/fpls.2019.00009>
- 961 van Slageren, M. W. (1994). Wild wheats: a monograph of *Aegilops* L. and *Amblyopyrum* (Jaub. &  
962 Spach) Eig (Poaceae). *Wageningen Agricultural University Papers*(94-7).
- 963 VAN ZEIST, W. (1992). The origin and development of plant cultivation in the Near East. *Nichibunken*  
964 *Japan Review*, 149-165.
- 965 Wang, X., Luo, G., Yang, W., Li, Y., Sun, J., Zhan, K., Liu, D., & Zhang, A. (2017). Genetic diversity,  
966 population structure and marker-trait associations for agronomic and grain traits in wild diploid  
967 wheat *Triticum urartu*. *BMC Plant Biology*, 17(1), 112. [https://doi.org/10.1186/s12870-017-  
968 1058-7](https://doi.org/10.1186/s12870-017-<br/>968 1058-7)
- 969 Weir, B. S., & Cockerham, C. C. (1984). Estimating F-statistics for the analysis of population structure.  
970 *evolution*, 1358-1370.

- 971 Wulff, B. B. H., & Moscou, M. J. (2014). Strategies for transferring resistance into wheat: from wide  
972 crosses to GM cassettes [Review]. *Frontiers in Plant Science*, 5(692).  
973 <https://doi.org/10.3389/fpls.2014.00692>
- 974 Zaharieva, M., & Monneveux, P. (2014). Cultivated einkorn wheat (*Triticum monococcum* L. subsp.  
975 *monococcum*): the long life of a founder crop of agriculture. *Genetic Resources and Crop*  
976 *Evolution*, 61(3), 677-706. <https://doi.org/10.1007/s10722-014-0084-7>  
977  
978



979

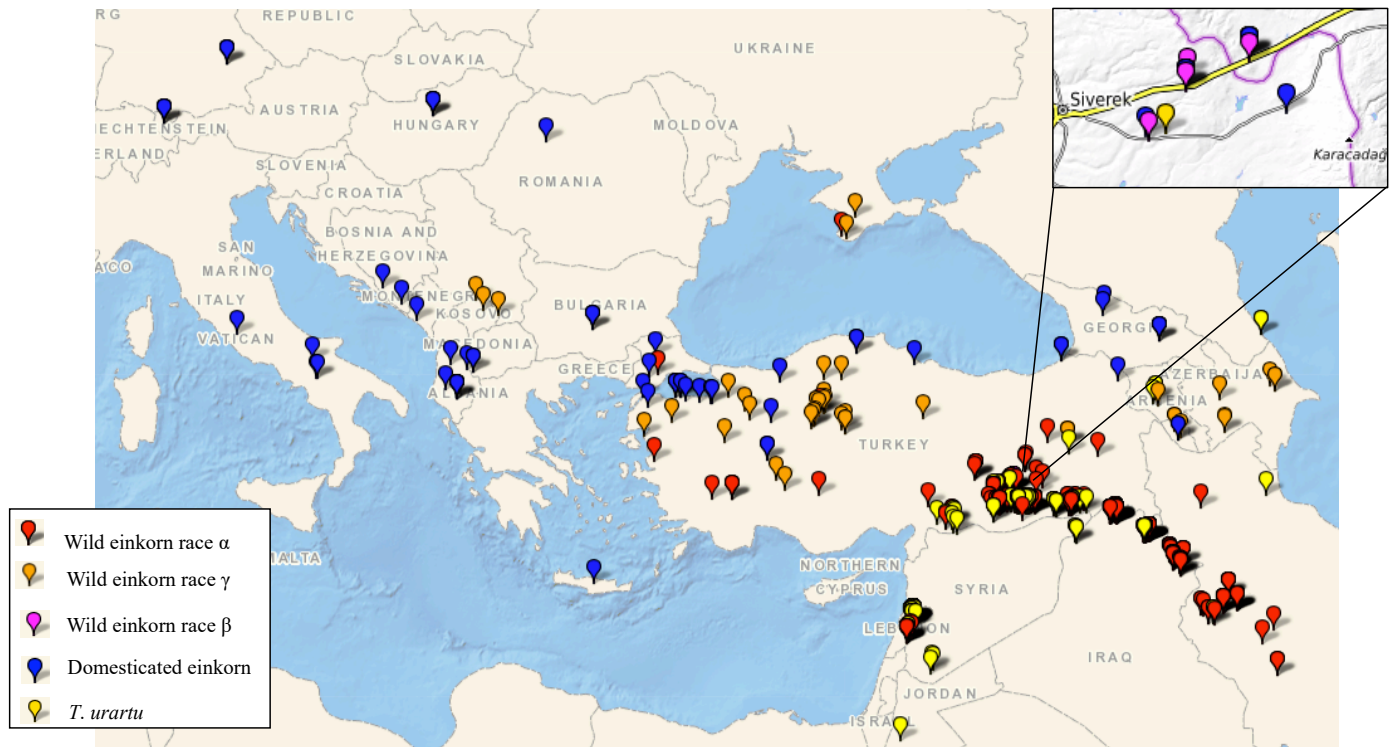

980

981

982

983 **Figure 1.** Geographic distribution of A-genome wheat species in the WGRC gene bank. Collection sites

984 of accessions in this study are designated for domesticated einkorn (*Triticum monococcum* subsp.

985 *monococcum*) (red);  $\alpha$  race within wild einkorn (*T. monococcum* subsp. *aegilopoides*) (blue);  $\gamma$  race

986 wild einkorn (orange);  $\beta$  race wild einkorn (magenta); and *T. urartu* (yellow).

987

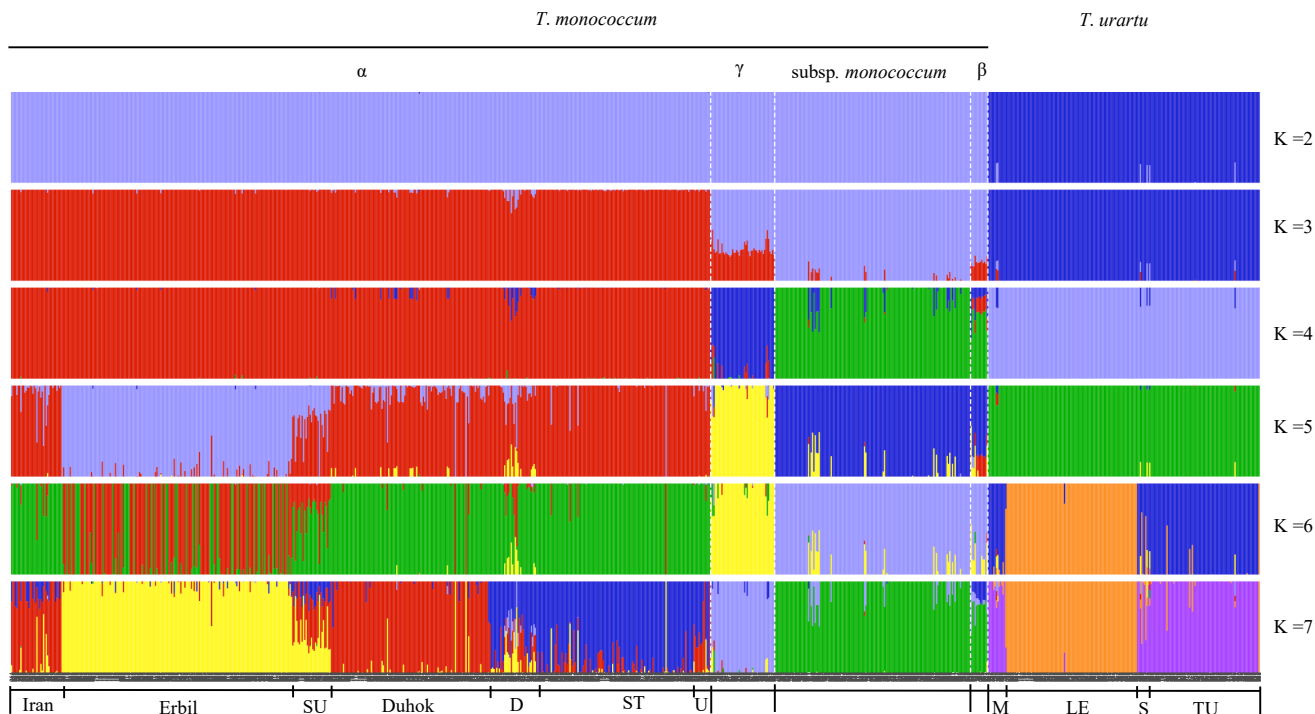

988

989

990 **Figure 2.** Population structure of A-genome wheat species: *Triticum monococcum* L. and *T. urartu*.

991 Subpopulations were determined using fastStructure at K=2 to K=7. Each color represents a population,

992 and each bar indicates the admixture proportion of an individual accession from K populations. The

993 subgroup within  $\alpha$ , which is exemplified by yellow color sole includes the accessions from Erbil (also

994 spelled Arbil), Iraq, whereas the subgroup embodied by red color only comprises the accessions from

995 Duhok (ancient name ‘Dahuk’, Iraq). The bars with purple color only represent the accessions from

996 southeast Turkey (ST). Other admixture types within  $\alpha$  included accessions were from Iran, SU

997 (Sulaymaniyah (Iraq)), random different sites (D) and unknown sites (U) as indicated. Within *T. urartu*,

998 the LE group represents accessions from Lebanon, the TU includes accession from Turkey, S indicates

999 accessions from Syria and M shows accessions from mixed sites.

1000



1001

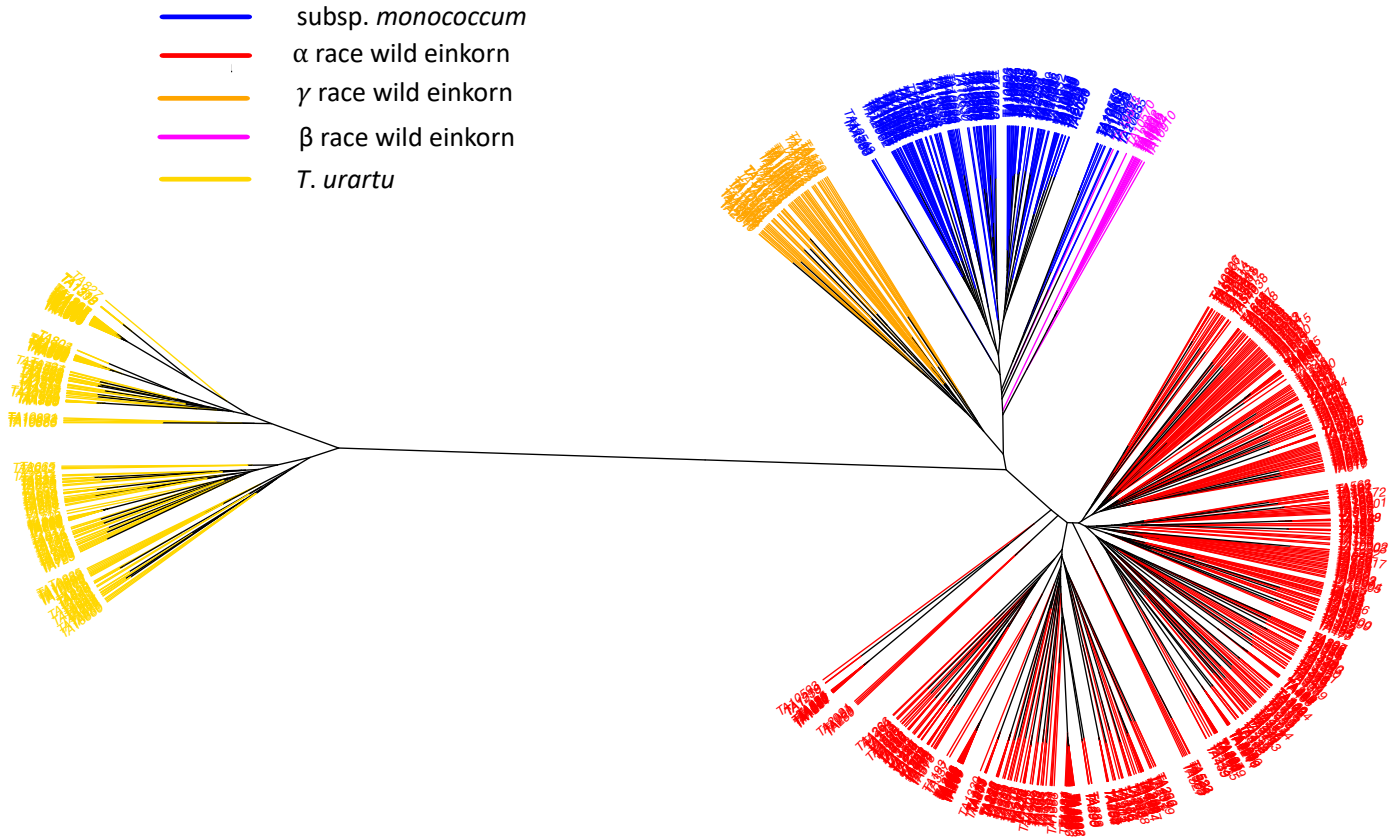

1002

1003

1004 **Figure 3.** An unrooted Neighbor-Joining (NJ) tree of A-genome species: *T. urartu*, subsp. *aegilopoides*,

1005 and subsp. *monococcum*. The tree branches are colored based on the genetic grouping of the accessions

1006 after correcting misclassified accessions. *T. urartu* (yellow), domesticated einkorn (red), wild einkorn

1007 race  $\alpha$  (blue), and wild einkorn race  $\gamma$  (green) are shown.

1008

1009

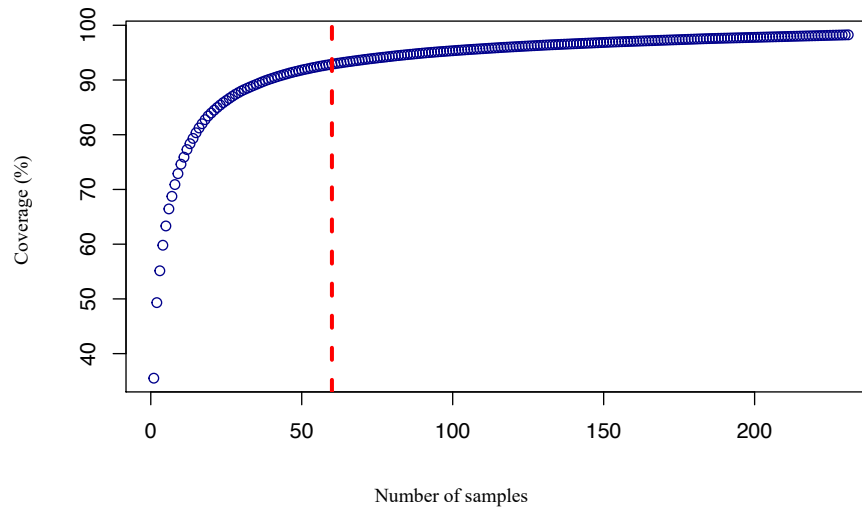

1010

1011 **Figure 4.** Relationship between the allele coverage as estimated using GenoCore and the number of  
1012 samples selected in the core for einkorn group (*T. monococcum*). The threshold for 60 accessions at  
1013 approximately 90% genotype coverage is shown with vertical red line.

1014

1015
